## Increased Exposure to Estrogens Disturbs Maturation, Steroidogenesis, and Cholesterol Homeostasis via Estrogen Receptor $\alpha$ in Adult Mouse Leydig Cells

Leena Strauss, Jenny Kallio, Nimisha Desai, Pirjo Pakarinen, Tatu Miettinen, Helena Gylling, Martin Albrecht, Sari Mäkelä, Artur Mayerhofer, and Matti Poutanen

Department of Physiology (L.S., J.K., N.D., P.P., M.P.), Institute of Biomedicine, Turku Center for Disease Modeling (P.P., M.P.), and Functional Foods Forum and Department of Biochemistry and Food Chemistry (S.M.), University of Turku, 20520 Turku, Finland; Department of Medicine (T.M.), Division of Internal Medicine, University of Helsinki, 00014 Helsinki, Finland; Department of Clinical Nutrition and Department of Medicine (H.G.), University of Kuopio and Kuopio University Hospital, 70211 Kuopio, Finland; and Institute for Cell Biology (M.A., A.M.), Ludwig-Maximilians-University, 80802 Munich, Germany

Deteriorated male reproductive health has been connected to overexposure to estrogens or to imbalanced androgen-estrogen ratio. Transgenic male mice expressing human aromatase (AROM<sup>+</sup> mice) serve as an apt model for the study of the consequences of an altered androgen-estrogen ratio. Our previous studies with AROM<sup>+</sup> mice showed that low androgen levels together with high estrogen levels result in cryptorchidism and infertility. In the present study, the AROM<sup>+</sup> mice were shown to have severe abnormalities in the structure and function of Leydig cells before the appearance of spermatogenic failure. Decreased expression of adult-type Leydig cell markers (*Ptgds*, *Vcam1*, *Insl3*, *Klk21*, *-24* and *-27*, *Star*, *Cyp17a1*, and *Hsd17b3*) indicated an immature developmental stage of the Leydig cells, which appears to be the first estrogen-dependent alteration. Genes involved in steroidogenesis (*Star*, *Cyp17a1*, and *Hsd17b3*) were suppressed despite normal LH levels. The low expression level of kallikreins 21, 24, and 27 potentially further inhibited Leydig cell function via remodeling extracellular matrix composition. In connection with disrupted steroidogenesis, Leydig cells showed enlarged mitochondria, a reduced amount of smooth endoplasmic reticulum, and an accumulation of cholesterol and precursors for cholesterol synthesis. The results of studies with AROM<sup>+</sup> mice crossed with estrogen receptor  $\alpha$  or  $\beta$  (ER $\alpha$  and ER $\beta$ , respectively) knockout mice lead to the conclusion that the structural and functional disorders caused by estrogen exposure were mediated via ER $\alpha$ , whereas ER $\beta$  was not involved. (*Endocrinology* 150: 2865–2872, 2009)

Estrogen excess, especially during the fetal or neonatal period, has been connected to several male reproductive disorders, such as cryptorchidism, epididymal defects, impaired fertility, and increased incidence of testicular cancer (1). However, the androgen-estrogen balance has been postulated to be more important than absolute levels of estrogens or androgens for male fertility (2) and for reproductive tract function (3, 4).

Estrogens have been suggested to control Leydig cell function at various stages of development. Prenatal estrogen treatment has been shown to affect the differentiation of fetal Leydig cells (5), and the regeneration of Leydig cells was inhibited by estro-

gens in a rat model mimicking postnatal Leydig cell development (6). Several studies also indicated a role for estradiol (E2) as a paracrine/autocrine factor in the regulation of steroidogenesis in the Leydig cells, and a synthetic estrogen, diethylstilbestrol, has been shown to inhibit 17 $\alpha$ -hydroxylase activity in the mature mouse testis (7). This was later confirmed in studies showing that estrogens regulate 17 $\alpha$ -hydroxylase gene expression in the post-pubertal (8) and fetal (9) rodent testis. Recent studies with mice lacking functional estrogen receptor (ER) $\alpha$  or  $\beta$  [ER knockout (ERKO) and BERKO, respectively] suggest that regulation of steroidogenic genes in fetal Leydig cells is, at least partially, me-

ISSN Print 0013-7227 ISSN Online 1945-7170  
Printed in U.S.A.

Copyright © 2009 by The Endocrine Society

doi: 10.1210/en.2008-1311 Received September 11, 2008. Accepted January 27, 2009.

First Published Online February 5, 2009

Abbreviations: BERKO, ER $\beta$  Knockout; E2, Estradiol; ECM, extracellular matrix; EM, electron microscopy; ER, estrogen receptor; ERKO, ER $\alpha$  knockout; IGFBP-3, IGF-binding protein-3; qRT-PCR, quantitative real-time RT-PCR; SER, smooth endoplasmic reticulum; T, testosterone; WT, wild type.

diated via ER $\alpha$  (10, 11). Estrogen has also been shown to inhibit 17 $\alpha$ -hydroxylase and hydroxysteroid (17 $\beta$ ) dehydrogenase type 3 gene expression through ER $\alpha$  in the mouse ovary (12, 13).

Normal steroidogenesis in Leydig cells requires the controlled expression and function of steroidogenic genes together with proper transport of steroid precursors between the inner and outer membrane of mitochondria and from mitochondria to the smooth endoplasmic reticulum (SER). It is well known that the first and rate-limiting step in steroidogenesis, *i.e.* transport of cholesterol from the outer to the inner membrane of mitochondria is initiated by steroidogenic acute regulatory protein (StAR) (14). Recently, it has been shown that in addition to providing matrix for the first step in steroidogenesis, mitochondria have an important regulatory role in steroidogenesis. Allen and co-workers (15) showed that to support LH-dependent steroidogenesis, mitochondria must be properly energized and polarized and be actively respiring. Furthermore, studies by Midzak and co-workers (16) indicated that inhibition of the mitochondrial electron transport chain blocks LH-dependent but stimulates basal testosterone (T) production in mouse Leydig cells. Although the effects of estrogens on mitochondrial function have been studied in several ER target cells, *e.g.* in human breast cancer cells and brain endothelial cells (17, 18), there are no previous studies reporting the effects of estrogens on Leydig cell mitochondria.

We have previously shown that male mice universally expressing low levels of human P450 aromatase gene (AROM<sup>+</sup> mice), thus having a low circulating and intratesticular androgen-estrogen ratio, are infertile, cryptorchid, and have Leydig cell hypertrophy and hyperplasia (19). In addition, chronic inflammation characterized by a high amount of activated macrophages, mast cell infiltration, and interstitial fibrosis are evident in the testis of aged AROM<sup>+</sup> mice (20). Interestingly, similar inflammation-related changes are observed in the testes of infertile men (21–23). In the present study, we demonstrate that chronic imbalance in the androgen-estrogen ratio leads to severe abnormalities in the development, structure, and function of mouse Leydig cells. The deleterious effects of estrogens were, furthermore, shown to be ER $\alpha$  mediated, whereas ER $\beta$  has no role in the process.

## Materials and Methods

### Animals and experimental groups

Generation of transgenic mice expressing human aromatase cDNA under the control of ubiquitin C promoter (AROM<sup>+</sup> mice) has been previously described (19). ERKO mice in C57BL/6J background (24) and BERKO mice in C57BL/6J/129 hybrid background (25) were crossbred to FVB/N background for seven generations. Thereafter, AROM<sup>+</sup> mice (in FVB/N background) were crossbred either with ERKO or BERKO mice. Genotyping of the mice was carried out as previously described (19, 24, 25). The mice had free access to soy-free food pellets (SDS; Witham, Essex, UK) and tap water. All animal experimentation was conducted in accordance with the institutional animal care policies of the University of Turku (Turku, Finland). Animal experiments were approved by the respective authorities, and the institutional policies on animal experimentation fully met the requirements as defined in the National Institutes of Health guide on animal experimentation.

### Expression array

A genome-wide gene expression study from the testis was performed using Sentrix Mouse-6 Expression BeadChip microarrays (Illumina Inc., San Diego, CA). The testes of three 3-month-old AROM<sup>+</sup> mice were compared with three age-matched wild-type (WT) controls. Total RNA was isolated from testes using Trizol reagent (Invitrogen, Carlsbad, CA) as homogenization solution and purified further with the RNeasy RNA isolation mini kit (QIAGEN GmbH, Hilden, Germany) according to the manufacturer's instructions. Two micrograms of total RNA were converted to cDNA and subsequently to cRNA (including biotinylated UTP) using the Illumina TotalPrep RNA Amplification Kit. The cRNA was further hybridized to the Sentrix Mouse-6 Expression BeadChip microarray chip as instructed by the manufacturer. After hybridization, the fluorescent signal was quantified and analyzed using an Illumina Bead Array Reader. The quality of the experiment was controlled by the Illumina Bead Scan program (Illumina Inc., San Diego, CA). The data from the Illumina arrays were analyzed with the Knowledge Discovery Environment (KDE) program (InforSense, London, UK) and statistical programming language R. The data were first normalized with the Quantile method to remove technical variation. After normalization, the data were analyzed by calculating the mean values, logarithmic intensity ratio

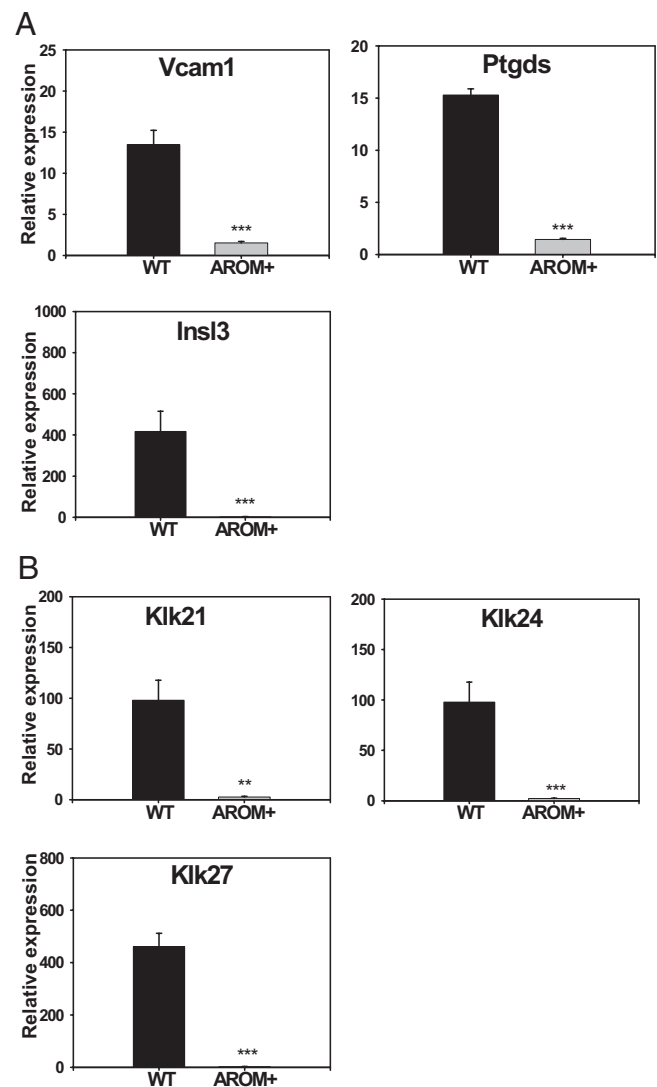

**FIG. 1.** Down-regulation of the expression of adult-type Leydig cell markers in 3-month-old AROM<sup>+</sup> mouse testis. The expression of *Vcam1*, *Ptgds*, and *InsI3* (A) and *Kik21*, *Kik24*, and *Kik27* (B) was significantly down-regulated in AROM<sup>+</sup> mouse testis as compared with the age-matched WT testis. *n* = 6 in all study groups. \*\*, *P* ≤ 0.01; \*\*\*, *P* ≤ 0.001.

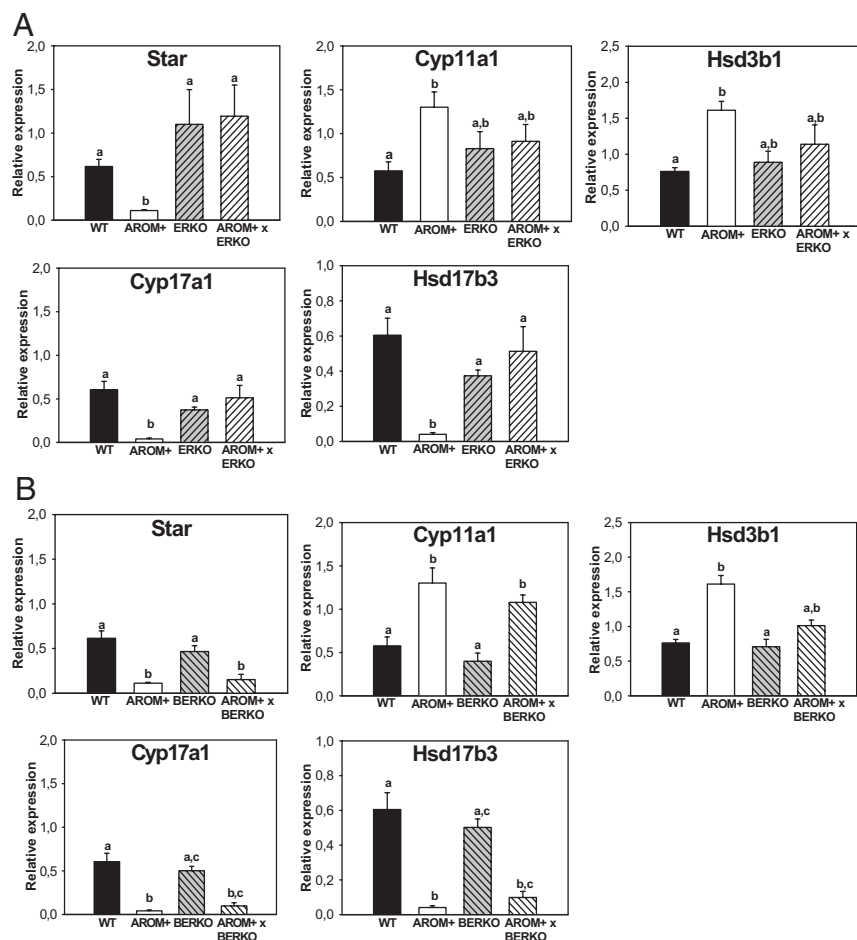

**FIG. 2.** A, The down-regulation of steroidogenic gene expression, *Star*, *Cyp17a1*, and *Hsd17b3*, in the AROM<sup>+</sup> mouse testis was ER $\alpha$  dependent, because the expression levels were normalized to the WT levels in the AROM<sup>+</sup> mice crossbred with the ERKO mice. B, The lack of ER $\beta$  in the AROM<sup>+</sup> mice had no effect on the expression of *Star*, *Cyp17a1*, and *Hsd17b3* in the AROM<sup>+</sup> mice. The expression levels of *Cyp11a1* and *Hsd3b1* were slightly higher in the AROM<sup>+</sup> mice probably due to the increased relative number of Leydig cells in the AROM<sup>+</sup> mice as compared with the WT mice (A and B). There is a statistically significant difference ( $P \leq 0.05$ ) between the groups provided with different letters.  $n = 6$  in all groups studied.

(logR), logarithmic mean intensity (A), and fold change (FC) for two experimental groups. The statistical significances of the differences in gene expression values (Log<sub>2</sub> transformed) between AROM<sup>+</sup> and WT testes were analyzed using the *t* test. Only the genes that were over 2.0-fold up- or down-regulated in the AROM<sup>+</sup> group and having a *P* value < 0.05 were listed.

### Quantitative real-time RT-PCR (qRT-PCR)

The expression of adult-type Leydig cell marker and steroidogenic enzyme genes was analyzed by qRT-PCR. Total RNA was isolated from testes using the RNeasy mini kit (QIAGEN). One microgram of total RNA was thereafter treated with deoxyribonuclease (DNase I Amplification Grade Kit; Invitrogen Life Technologies, Paisley, UK). cDNA synthesis and RT-PCR were performed using the DyNAmo two-step SYBR Green qRT-PCR kit (Finnzymes Oy, Espoo, Finland). The expression levels were analyzed in proportion to the L19,  $\beta$ -actin, and cyclophilin housekeeping genes. The primer sequences used in this study are available on request.

### Hormone measurements

Serum LH and FSH levels were measured by using time-resolved immunofluorometric assays as described previously (26). For intratesticular T and E2 measurements, the testes were weighed and homogenized in Dulbecco's PBS. E2 and T were extracted from the homogenates

using diethyl ether. After extraction, the organic phase was evaporated to dryness, and the steroids were solubilized in PBS with 0.1% BSA. E2 concentrations were measured by an immunofluorometric assay, using the human E2 DELFIA kit (PerkinElmer Wallac Oy, Turku, Finland) adapted for mouse samples. T levels were measured by a RIA as described previously (27).

### Electron microscopy studies

Whole testes were fixed for 2 h in 5% electron microscopy (EM)-grade glutaraldehyde (Sigma-Aldrich, St. Louis, MO) in PBS after which they were cut into four pieces. The samples were then fixed for an additional 2–3 d at +4 C and then stored in PBS at +4 C. As described previously (28, 29), samples were postfixed with 4% OsO<sub>4</sub>/potassium hexacyanoferrate (II). After embedding in Epon, semi-thin and ultra-thin sections were cut, contrasted with uranyl acetate (2%) / lead citrate (2.7%), and examined with an EM10 electron microscope (Zeiss, Jena, Germany).

### Lipid measurements

The testes were weighed, cut with scissors into small pieces, and homogenized in chloroform/methanol with Ultra Turrax after the addition of internal standards 5 $\alpha$ -cholestane and epicoprostanol. After homogenization, sterols were first subjected to analysis by thin-layer chromatography. Esterified sterols, with 5 $\alpha$ -cholestane, were extracted from the front area of the thin-layer chromatography plate, and free sterols were extracted from the lower area of the plate, including free cholesterol, plant sterols, methyl sterols, and epicoprostanol. The esterified sterol fraction was saponified, subjected separately with the free sterol fraction to gas liquid chromatographic (GLC) analysis as trimethylsilyl-derivatives, principally as described earlier (30) using a 50-m-long Ultra 2 capillary column (Agilent Technologies, Wilmington, DE). Concentrations of cholesterol, cholestenol, lathosterol, desmosterol, and lanosterol were measured by the gas liquid chromatographic procedure in increasing order of retention time. The coefficients of variation for the different sterols were as follows: cholesterol 3.2%, desmosterol 6.0%, and lathosterol 3.7%.

### Statistical analysis

Statistical analyses (from other than microarray results) were performed by the SigmaStat program (version 3.1 for Windows 2000 and XP; SPSS Inc., Chicago, IL). Student's *t* test or the Mann-Whitney rank sum test was performed for analyzing the statistical significance ( $P < 0.05$ ) between two groups, whereas one-way ANOVA or Kruskal-Wallis one-way ANOVA on ranks was applied for analyzing several groups.

### Results

A genome-wide expression array was performed at the age of 3 months. At this age, the spermatogenesis in the AROM<sup>+</sup> mice was qualitatively normal based on testicular morphology, whereas it was severely disrupted at a later age. The data indicated that 30 genes were down-regulated in the testis of AROM<sup>+</sup> mice as compared with WT mice (supplemental Table 1, published as supplemental data on The Endocrine Society's Journals

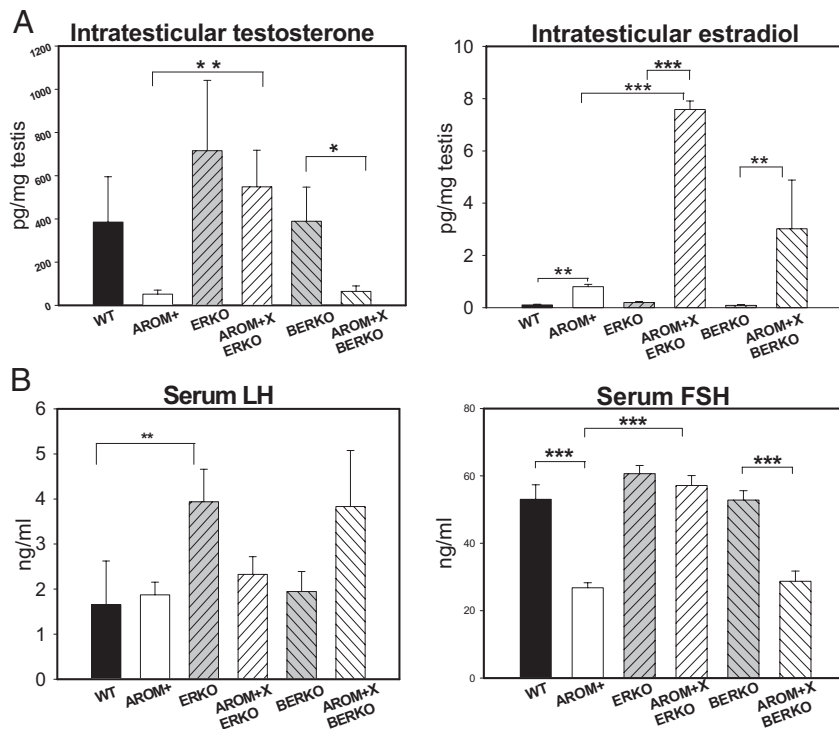

**FIG. 3.** Serum (A) and intratesticular (B) hormone concentrations in different mouse groups. Serum LH levels were significantly elevated in the ERKO mice as compared with the WT mice. Serum FSH concentration was significantly lower in the AROM<sup>+</sup> mice as compared with the WT group, and crossing with the ERKO mice corrected the concentration to the WT level. Intratesticular T levels were lower (not significantly) and E2 higher in the AROM<sup>+</sup> mice as compared with the WT mice. Crossing of the AROM<sup>+</sup> mice with the ERKO mice further increased E2 levels, whereas T levels were rescued to the WT levels. Lack of ER $\beta$  had no effect on hormone levels. Pairwise Student's *t* test or the Mann-Whitney rank sum test was performed to analyze statistical significance as follows: WT vs. AROM<sup>+</sup>, WT vs. ERKO, WT vs. BERKO, AROM<sup>+</sup> vs. AROM<sup>+</sup> × ERKO, AROM<sup>+</sup> vs. AROM<sup>+</sup> × BERKO, ERKO vs. AROM<sup>+</sup> × ERKO, and BERKO vs. AROM<sup>+</sup> × BERKO. \*, *P* ≤ 0.05; \*\*, *P* ≤ 0.01; \*\*\*, *P* ≤ 0.001. *n* = 6 in all study groups.

Online web site at <http://endo.endojournals.org>). The AROM<sup>+</sup> mice presented with low-level expression of several marker genes for matured adult-type Leydig cells including *Insl3* (13.3-fold), *Ptgds* (7.4-fold), and *Vcam1* (2.8-fold). In addition, the expression of steroidogenic enzymes *Hsd17b3* (2.5-fold) and *Cyp17a1* (2.1-fold) and Leydig cell-specific extracellular matrix (ECM) proteinases *Klk21*, *Klk24*, and *Klk27* (8.5-, 6.5-, and 4.6-fold, respectively) were significantly lower in AROM<sup>+</sup> mice. The genes marked with asterisks in supplemental Table 1 were recently shown to be down-regulated by estrogen also in the fetal-type Leydig cells (11). Low-level expression of *Insl3*, *Vcam1*, *Ptgds*, *Klk21*, *Klk24*, and *Klk27* expression was further confirmed by qRT-PCR analysis (Fig. 1). These data indicate an immature developmental stage of Leydig cells in young adult AROM<sup>+</sup> males.

qRT-PCR analyses showed that the expression of *Star*, *Cyp17a1*, and *Hsd17b3* was significantly decreased in young AROM<sup>+</sup> testes as compared with the WT mice, and the expression was normalized to the WT level in AROM<sup>+</sup> mice crossbred with ERKOs (Fig. 2A). In contrast, the gene expression was not normalized by crossing the AROM<sup>+</sup> mice with the BERKO mice (Fig. 2B), suggesting that down-regulation of the steroidogenesis in AROM<sup>+</sup> testis is estrogen dependent and particularly ER $\alpha$  mediated. The elevated expression levels of *Cyp11a1* and *Hsd3b1* in the AROM<sup>+</sup> mice (Fig. 2, A and B) probably reflect

the increased relative number of Leydig cells in AROM<sup>+</sup> mice as compared with the WT mice. The down-regulation of the expression of *Star*, *Cyp17a1*, and *Hsd17b3* in AROM<sup>+</sup> Leydig was not explained by decreased serum LH levels. Only the ERKO mice had significantly increased LH levels, as has been previously shown (31, 32). Because of the enforced expression of the transgenic P450arom, the concentration of intratesticular E2 was significantly higher in the AROM<sup>+</sup> as compared with the WT mice, and crossing the AROM<sup>+</sup> mice with the ERKO mice further elevated the E2 levels, in line with the normalized T and FSH production in the AROM<sup>+</sup>/ERKO mice. Lack of ER $\beta$  had no effect on the hormone levels either in WT or in AROM<sup>+</sup> mice (Fig. 3).

Based on histological data, spermatogenesis was normal in all groups studied. However, in the ERKO mice, the tubules were slightly dilated (Fig. 4, C and D) as has been previously reported (33). In the AROM<sup>+</sup> mice, there were obvious changes in the interstitial tissue, *i.e.* hypertrophic Leydig cells (Fig. 4B). Similarly, hypertrophic Leydig cells were present in the interstitial tissue of the AROM<sup>+</sup> mice crossbred with the BERKO mice (Fig. 4F) but not in the AROM<sup>+</sup> mice crossbred with the ERKO mice (Fig. 4D). Thus, the Leydig cell hypertrophy in AROM<sup>+</sup> testis is ER $\alpha$  mediated. EM of AROM<sup>+</sup> testis further indicated ultrastructural changes in Leydig cells, *i.e.* the mitochondria were strikingly enlarged, SER was barely visible, and lipid accumulation (with the presence of cholesterol crystals) was evident (Fig. 5A). These results were also apparent in the AROM<sup>+</sup> mice crossbred with the BERKO mice but not in the AROM<sup>+</sup> mice crossbred with the ERKO mice. Together with light microscopy, the EM results show that the ultrastructural changes in the AROM<sup>+</sup> Leydig cells were ER $\alpha$  mediated (Fig. 5, D and E).

Lipid measurements from testis homogenates indicated that concentration of cholesterol, especially cholesterol ester, was significantly increased in the testes of the AROM<sup>+</sup> mice as compared with those of the WT mice (Table 1). In contrast, the serum cholesterol levels were decreased in the AROM<sup>+</sup> mice (data not shown). Furthermore, several intermediates of cholesterol biosynthesis (cholestenol, desmosterol, lathosterol, and lanosterol) (34, 35) were markedly accumulated in the AROM<sup>+</sup> mouse testis (Table 1). The data thus suggest that *de novo* cholesterol biosynthesis is increased in the Leydig cells of AROM<sup>+</sup> mice.

## Discussion

We have previously shown that a low androgen-estrogen ratio in male mice expressing human aromatase gene under ubiquitin C

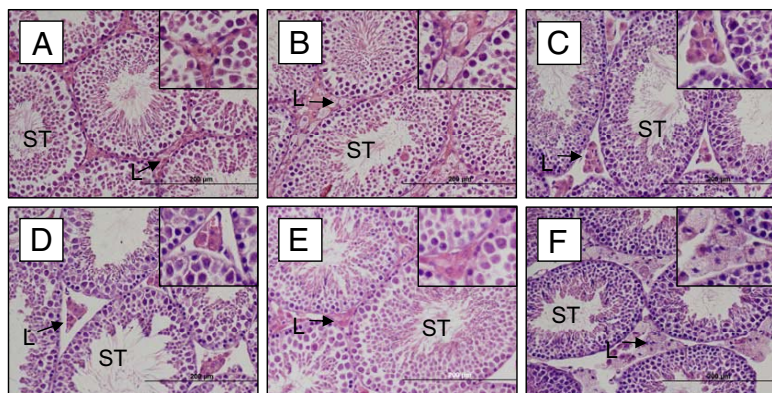

**FIG. 4.** Histological staining of the testes of 3-month-old mice demonstrated that the Leydig cell hypertrophy in the AROM<sup>+</sup> mice is ER $\alpha$  dependent. At the age of 3 months, the hypertrophy of the Leydig cells (arrow) is the only apparent histological phenotype in AROM<sup>+</sup> (B) as compared with the WT (A). The Leydig cells of ERKO (C), AROM<sup>+</sup> crossed with ERKO (D), and BERKO (E) mice had no signs of hypertrophy, whereas the Leydig cells of AROM<sup>+</sup> crossed with BERKO (F) mice resembled those of the AROM<sup>+</sup> mice. Leydig cells are presented with a higher magnification in the upper right corners. L, Leydig cell; ST, seminiferous tubule. Bar, 200  $\mu$ m.

promoter (AROM<sup>+</sup> mice) results in infertility and cryptorchidism (19). This testicular dysfunction develops progressively; spermatogenesis is normal immediately after puberty but is destroyed during ageing in association with macrophage and mast cell infiltration and activation (20). However, as shown in the present study, the first estrogen-induced molecular and structural changes in the testis of young adult AROM<sup>+</sup> mice appear in the Leydig cells that are hypertrophic and present with disrupted maturation and reduced steroidogenic capacity associated with markedly enlarged mitochondria.

The expression of the *Insl3*, *Ptgds*, *Vcam1*, *Star*, *Cyp17a1*, and *Hsd17b3* genes is often used as a marker for adult, matured Leydig cells (36–38). The expression of the above mentioned markers was lower in the AROM<sup>+</sup> testis at the age of 3 months, suggesting that the maturation of Leydig cells is not completed. Lipid accumulation that was evident in the Leydig cells of the AROM<sup>+</sup> mice is also a characteristic feature of immature adult Leydig cells (39). Our studies thus support the hypothesis that estrogens act as paracrine/autocrine factors in controlling adult-type Leydig cell development (40).

In addition to the elevated E2 levels caused by overexpression of P450arom, the AROM<sup>+</sup> mice have low intratesticular and circulating T levels, although LH concentrations are normal (19, 41). In the present study, only ERKO mice had increased LH levels, which is in line with the previously observed reduction in feedback regulation due to the lack of ER $\alpha$  in the central nervous system (31, 32). Interestingly, in AROM<sup>+</sup>, AROM<sup>+</sup>/ERKO, and AROM<sup>+</sup>/BERKO mice, the LH levels were similar to the wild-type mice, despite the different circulating androgen and estrogen levels in these mouse models. We thus suggest that in the mice with aberrant P450arom expression during development, the pituitary feedback regulatory system is misprogrammed to allow abnormal circulating steroid levels. This gonadostat regulation is most likely not mediated via ER $\alpha$ , because also in the AROM<sup>+</sup>/ERKO mice, the LH levels were not different from the WT mice, regardless of the observed increase in E2 concentration.

Despite the normal LH level, the expression of *Star*, *Cyp17a1*, and *Hsd17b3* was significantly lower in the AROM<sup>+</sup> mouse

testis, suggesting that the down-regulation is mediated via direct estrogen action. Further evidence for this, and the role of ER $\alpha$  in mediating the effects, was obtained by observing a normalized expression for these mRNAs in AROM<sup>+</sup> mice crossbred with the ERKO mice but not in those crossbred with the BERKO mice. A direct estrogen effect is also supported by the data showing that in the mice lacking functional androgen receptor, *Star* and *Cyp17a1* are not suppressed (42); neither is the expression of *Star* and *Cyp17a1* changed in cryptorchid mice (43), suggesting that cryptorchidism or low androgen levels in the AROM<sup>+</sup> mice do not explain the down-regulation of these steroidogenic enzymes. In contrast, the expression levels of *Insl3*, *Ptgds*, *Vcam1*, and *Hsd17b3* are diminished in the AROM<sup>+</sup> mice and in cryptorchid (43) and AR mutant mice (42). It is, therefore, difficult to conclude whether their expression is suppressed by a reduced level of androgens,

by an excess of estrogens, or by other mechanisms connected to cryptorchidism. Our results were compared with those of Cederoth and co-workers (11) who exposed pregnant WT, ERKO, and BERKO female mice to pharmacological doses of E2 and diethylstilbestrol and thereafter performed genome-wide expression analysis in fetal testes. Interestingly, four genes (*Insl3*, *Cyp17a1*, *Star*, and *Ren1*) were found to be similarly lower in the studies with fetal (11) and adult-type (present study) Leydig cells after estrogen exposure. Previous studies show the estrogen-dependent regulation of *Cyp17a1* (8) and *Star* (44) genes in Leydig cells, whereas *Ren1* is a novel hormonally regulated gene in the testis. Taken together, our results indicate that estrogens are able to regulate steroidogenesis and Leydig cell function via an ER $\alpha$ -dependent pathway, and this occurs independently of the hypothalamus-pituitary axis.

Our studies also showed that the expression of genes for ECM serine proteases, kallikrein 21, 24, and 27, were significantly lower in the testis of the AROM<sup>+</sup> mouse as compared with the WT mouse testis. Reduced levels of kallikreins in the AROM<sup>+</sup> testis are most likely due to low androgen levels. Kallikrein 24 has been shown to be androgen but not estrogen regulated *in vitro* (45), and the expression of these three kallikreins has also been found to be reduced in the testis of AR mutant mice (42). In the testis, kallikreins 21, 24, and 27 are exclusively expressed in the Leydig cells, and their expressions are shown to increase during development, being highest at the age of 8 wk (45–47). Thus, they can be considered as adult-type Leydig cell markers. Kallikreins 21 and 24 have trypsin-like and kallikrein 27 chemotrypsin-like activity, and they have been shown to degrade ECM components such as fibronectin, gelatin, and IGF-binding protein-3 (IGFBP-3) (45–47). The improper turnover of ECM due to decreased levels of the kallikreins might thus be one of the mechanisms leading to the development of fibrosis in the AROM<sup>+</sup> mouse testis (20). On the other hand, IGFBP-3 is a potent inhibitor of IGF-I-induced T formation (48), and the lack of kallikreins might increase IGFBP-3 concentration and thus suppress T synthesis. Taking into consideration that the adhesion, shape, and proliferation of mouse Leydig cells have been shown to be influenced by ECM *in*

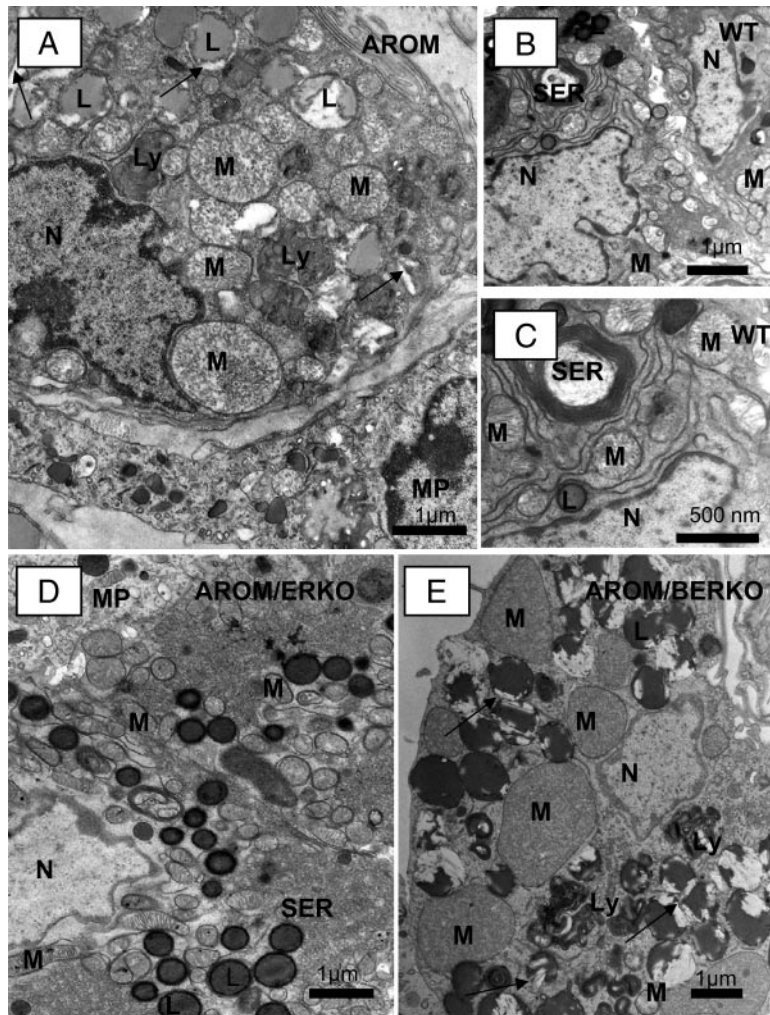

**FIG. 5.** Ultrastructural studies of the Leydig cells in 3-month-old *AROM*<sup>+</sup> mice (A) showed abundant lipid droplets (L) associated with cholesterol crystals (arrows), decreased amount of SER, and strikingly enlarged mitochondria (M) compared with the age-matched WT mice (B and C). The ultrastructure of the Leydig cells of the *AROM*<sup>+</sup> mice crossbred with the ERKO mice (D) resembled that of the WT mice, whereas in the *AROM*<sup>+</sup> mice crossbred with BERKO mice (E), the Leydig cells had similar abnormalities as the *AROM*<sup>+</sup> mice; the mitochondria were enlarged, there was lipid accumulation and cholesterol crystals (arrows), and the amount of SER was decreased. Ly, Lysosome, MP, macrophage; N, nucleus. Bar, 1  $\mu$ m (A, B, D, and E) or 500 nm (C).

*vitro* (49), the low gene expression level of the ECM-degrading kallikreins may have an important role in the pathogenesis of *AROM*<sup>+</sup> testis.

In addition to cholesterol accumulation in the *AROM*<sup>+</sup> Leydig cells, the amount of cholesterol synthesis intermediates was

also increased. We therefore postulate that *de novo* cholesterol synthesis is enhanced in the testis of *AROM*<sup>+</sup> mice. In line with these results, there is evidence for a subset of cholesterol biosynthetic genes being directly down-regulated by T (42), whereas no studies are available on estrogen regulation of cholesterol biosynthesis in the testis. Interestingly, accumulation of cholesterol ester in the Leydig cells have been observed in mice deficient in estrogen sulfotransferase (EST), an enzyme that inactivates estrogens (8). Our results, together with studies of EST knockout mice, indicate that estrogens partially regulate *de novo* cholesterol synthesis in the Leydig cells.

Interestingly, the size of the mitochondria in the Leydig cells of 3-month-old *AROM*<sup>+</sup> mice were strikingly increased as compared with WT mice, whereas the structure of mitochondria were morphologically normal. Enlarged mitochondria are connected to insufficient autophagy of the cells (50–53). Normally, mitochondria undergo fusion and fission, and this process has an important role in establishing, maintaining, and remodeling mitochondria (54–56). Formation of giant mitochondria as a consequence of improper steroidogenesis has not been previously reported. Allen and co-workers (15) recently demonstrated that normal mitochondrial membrane potential is required for acute steroid biosynthesis in Leydig cells, and Navratil and co-workers (57) showed that giant mitochondria in rat myoblast cells have lowered membrane potential, leading them to postulate that enlarged mitochondria in *AROM*<sup>+</sup> Leydig cells might also disturb steroidogenesis. The mechanism by which low androgen/high estrogen levels result in the formation of giant mitochondria needs to be studied further. Both ER $\alpha$  and ER $\beta$  are localized to the mitochondria of several cell types (18, 58, 59), and they have been shown to induce the expression of mitochondrial DNA-encoded genes as transcription factors (60, 61). Estrogen action in the mitochondria has been shown to increase the capacity for energy production and to decrease the production of reactive oxygen species (17, 18). There are no studies about subcellular localization of ERs in Leydig cells. However, the ultrastructure of the

mitochondria has been shown to increase the capacity for energy production and to decrease the production of reactive oxygen species (17, 18). There are no studies about subcellular localization of ERs in Leydig cells. However, the ultrastructure of the

**TABLE 1.** Lipid measurements from testis homogenates

|                          | Cholesterol<br>(ng/100 mg testis) | Cholestenol<br>(ng/100 mg testis) | Desmosterol<br>(ng/100 mg testis) | Lathosterol<br>(ng/100 mg testis) | Lanosterol<br>(ng/100 mg testis) |
|--------------------------|-----------------------------------|-----------------------------------|-----------------------------------|-----------------------------------|----------------------------------|
| WT                       |                                   |                                   |                                   |                                   |                                  |
| Free                     | 174.5 $\pm$ 3.39                  | 79.8 $\pm$ 4.32                   | 3536 $\pm$ 90.3                   | 941 $\pm$ 22.2                    | 227.2 $\pm$ 25.3                 |
| Ester                    | 24.38 $\pm$ 5.87                  | 26.2 $\pm$ 3.83                   | 144 $\pm$ 20.7                    | 49.2 $\pm$ 4.90                   | 79.4 $\pm$ 11.3                  |
| <i>AROM</i> <sup>+</sup> |                                   |                                   |                                   |                                   |                                  |
| Free                     | 204.8 $\pm$ 7.45                  | 190 $\pm$ 14.43                   | 3770 $\pm$ 126                    | 507 $\pm$ 40.0 <sup>b</sup>       | 417 $\pm$ 90.7                   |
| Ester                    | 732.7 $\pm$ 98.1 <sup>a</sup>     | 2808 $\pm$ 222 <sup>b</sup>       | 2065 $\pm$ 101 <sup>a</sup>       | 734 $\pm$ 74.4 <sup>a</sup>       | 1163 $\pm$ 41.1 <sup>a</sup>     |

Values are given as means  $\pm$  SEM; n = 5–7. P values are between WT and *AROM*<sup>+</sup>.

<sup>a</sup> P  $\leq$  0.01; <sup>b</sup> P  $\leq$  0.001.

Leydig cells, including mitochondrial alterations, was rescued when AROM<sup>+</sup> mice were crossbred with the ERKO mice, making it clear that the presence of giant mitochondria is directly or indirectly dependent on ER $\alpha$ .

In conclusion, our study shows that low T in connection with high E2 concentration has several effects on Leydig cell structure and function. In addition to showing an autocrine/paracrine effect of E2 on Leydig cell development and steroidogenesis, we showed that an abnormal androgen/estrogen ratio disturbs cholesterol homeostasis and mitochondrial morphology in mouse Leydig cells. Crossing of AROM<sup>+</sup> mice with ERKO or BERKO mice indicated that all the estrogen effects on Leydig cells are directly or indirectly ER $\alpha$  dependent, whereas none of the phenotypes were rescued by crossing with BERKO mice.

## Acknowledgments

We thank Katri Hovirinta, Taina Kirjonen, Erja Mäntysalo, Hannele Rekola from the University of Turku (Turku, Finland), and Gabriele Terfloth from the University of Munich (Munich, Germany) for technical assistance. We also thank Leena Kytömäki, Asta Laiho, and Marjo Linja from Turku Centre for Biotechnology for their help in microarray studies.

Address all correspondence and requests for reprints to: Matti Poutanen, University of Turku, Institute of Biomedicine, Department of Physiology, Kiinamylynkatu 10, 20520 Turku, Finland. E-mail: matti.poutanen@utu.fi.

This study was supported by grants from the Academy of Finland (211480 and 121527), European Commission-funded CASCADE NoE (Chemicals as Contaminants in the Food Chain: a Network of Excellence for Research, Risk Assessment, and Education) (FOOD-CT-2003-506319), and Academy of Finland (112587) together with Deutscher Akademischer Austauschdienst and Deutsche Forschungsgemeinschaft (MA 1080/16-3).

Disclosure Summary: L.S., J.K., N.D., P.P., T.M., H.G., M.A., S.M., and M.P. have nothing to disclose. A.M. received a grant from Deutsche Forschungsgemeinschaft for this study.

## References

- O'Donnell L, Robertson KM, Jones ME, Simpson ER 2001 Estrogen and spermatogenesis. *Endocr Rev* 22:289–318
- Luboshitzky R, Kaplan-Zverling M, Shen-Orr Z, Nave R, Herer P 2002 Seminal plasma androgen/oestrogen balance in infertile men. *Int J Androl* 25:345–351
- Rivas A, McKinnell C, Fisher JS, Atanassova N, Williams K, Sharpe RM 2003 Neonatal coadministration of testosterone with diethylstilbestrol prevents diethylstilbestrol induction of most reproductive tract abnormalities in male rats. *J Androl* 24:557–567
- McKinnell C, Saunders PT, Fraser HM, Kelnar CJ, Kivlin C, Morris KD, Sharpe RM 2001 Comparison of androgen receptor and oestrogen receptor  $\beta$  immunoreexpression in the testes of the common marmoset (*Callithrix jacchus*) from birth to adulthood: low androgen receptor immunoreexpression in Sertoli cells during the neonatal increase in testosterone concentrations. *Reproduction* 122:419–429
- Pérez-Martínez C, García-Iglesias MJ, Ferreras-Estrada MC, Bravo-Moral AM, Espinosa-Alvarez J, Escudero-Diez A 1996 Effects of in-utero exposure to zeronol or diethylstilboestrol on morphological development of the fetal testis in mice. *J Comp Pathol* 114:407–418
- Abney TO, Myers RB 1991 17 $\beta$ -Estradiol inhibition of Leydig cell regeneration in the ethane dimethylsulfonate-treated mature rat. *J Androl* 12:295–304
- Samules L, Short JG, Huseby RA 1964 The effects of diethylstilbestrol on testicular 17 $\alpha$ -desmolase activities in Balb/c mice. *Acta Endocrinol (Copenh)* 45:487–497
- Tong MH, Christenson LK, Song WC 2004 Aberrant cholesterol transport and impaired steroidogenesis in Leydig cells lacking estrogen sulfotransferase. *Endocrinology* 145:2487–2497
- Majdic G, Sharpe RM, O'Shaughnessy PJ, Saunders PT 1996 Expression of cytochrome P450 17 $\alpha$ -hydroxylase/C17–20 lyase in the fetal rat testis is reduced by maternal exposure to exogenous estrogens. *Endocrinology* 137:1063–1070
- Delbès G, Levacher C, Duquenne C, Racine C, Pakarinen P, Habert R 2005 Endogenous estrogens inhibit mouse fetal Leydig cell development via estrogen receptor  $\alpha$ . *Endocrinology* 146:2454–2461
- Cederroth CR, Schaad O, Descombes P, Chambon P, Vassalli JD, Nef S 2007 ER $\alpha$  is a major contributor to estrogen-mediated fetal testis dysgenesis and cryptorchidism. *Endocrinology* 148:5507–5519
- Taniguchi F, Couse JF, Rodriguez KF, Emmen JM, Poirier D, Korach KS 2007 Estrogen receptor- $\alpha$  mediates an intraovarian negative feedback loop on thecal cell steroidogenesis via modulation of Cyp17a1 (cytochrome P450, steroid 17 $\alpha$ -hydroxylase/17,20 lyase) expression. *FASEB J* 21:586–595
- Couse JF, Yates MM, Rodriguez KF, Johnson JA, Poirier D, Korach KS 2006 The intraovarian actions of estrogen receptor- $\alpha$  are necessary to repress the formation of morphological and functional Leydig-like cells in the female gonad. *Endocrinology* 147:3666–3678
- Stocco DM, Clark BJ 1996 Role of the steroidogenic acute regulatory protein (StAR) in steroidogenesis. *Biochem Pharmacol* 51:197–205
- Allen JA, Shankara T, Janus P, Buck S, Diemer T, Hales KH, Hales DB 2006 Energized, polarized, and actively respiring mitochondria are required for acute Leydig cell steroidogenesis. *Endocrinology* 147:3924–3935
- Midzak AS, Liu J, Zirkkin BR, Chen H 2007 Effect of myxothiazol on Leydig cell steroidogenesis: inhibition of luteinizing hormone-mediated testosterone synthesis but stimulation of basal steroidogenesis. *Endocrinology* 148:2583–2590
- Stirone C, Duckles SP, Krause DN, Procaccio V 2005 Estrogen increases mitochondrial efficiency and reduces oxidative stress in cerebral blood vessels. *Mol Pharmacol* 68:959–965
- Pedram A, Razandi M, Wallace DC, Levin ER 2006 Functional estrogen receptors in the mitochondria of breast cancer cells. *Mol Biol Cell* 17:2125–2137
- Li X, Nokkala E, Yan W, Streng T, Saarinen N, Warri A, Huhtaniemi I, Santti R, Mäkelä S, Poutanen M 2001 Altered structure and function of reproductive organs in transgenic male mice overexpressing human aromatase. *Endocrinology* 142:2435–2442
- Li X, Strauss L, Kaatrasalo A, Mayerhofer A, Huhtaniemi I, Santti R, Mäkelä S, Poutanen M 2006 Transgenic mice expressing p450 aromatase as a model for male infertility associated with chronic inflammation in the testis. *Endocrinology* 147:1271–1277
- Frungieri MB, Calandra RS, Lustig L, Meineke V, Köhn FM, Vogt HJ, Mayerhofer A 2002 Number, distribution pattern, and identification of macrophages in the testes of infertile men. *Fertil Steril* 78:298–306
- Meineke V, Frungieri MB, Jessberger B, Vogt H, Mayerhofer A 2000 Human testicular mast cells contain tryptase: increased mast cell number and altered distribution in the testes of infertile men. *Fertil Steril* 74:239–244
- Albrecht M, Frungieri MB, Gonzalez-Calvar S, Meineke V, Köhn FM, Mayerhofer A 2005 Evidence for a histaminergic system in the human testis. *Fertil Steril* 83:1060–1063
- Lubahn DB, Moyer JS, Golding TS, Couse JF, Korach KS, Smithies O 1993 Alteration of reproductive function but not prenatal sexual development after insertional disruption of the mouse estrogen receptor gene. *Proc Natl Acad Sci USA* 90:11162–11166
- Krege JH, Hodgin JB, Couse JF, Enmark E, Warner M, Mahler JF, Sar M, Korach KS, Gustafsson JA, Smithies O 1998 Generation and reproductive phenotypes of mice lacking estrogen receptor  $\beta$ . *Proc Natl Acad Sci USA* 95:15677–15682
- Haavisto AM, Pettersson K, Bergendahl M, Perheentupa A, Roser JF, Huhtaniemi I 1993 A supersensitive immunofluorometric assay for rat luteinizing hormone. *Endocrinology* 132:1687–1691
- Huhtaniemi I, Nikula H, Rannikko S 1985 Treatment of prostatic cancer with a gonadotrophin-releasing hormone agonist analog: acute and long term effects on endocrine functions of testis tissue. *J Clin Endocrinol Metab* 61:698–704
- Albrecht M, Rämisch R, Köhn FM, Schwarzer JU, Mayerhofer A 2006 Isolation and cultivation of human testicular peritubular cells: a new model for the investigation of fibrotic processes in the human testis and male infertility. *J Clin Endocrinol Metab* 91:1956–1960
- Bulling A, Berg FD, Berg U, Duffy DM, Stouffer RL, Ojeda SR, Gratzl M, Mayerhofer A 2000 Identification of an ovarian voltage-activated Na<sup>+</sup>-channel type: hints to involvement in luteolysis. *Mol Endocrinol* 14:1064–1074

30. Miettinen TA 1988 Cholesterol metabolism during ketoconazole treatment in man. *J Lipid Res* 29:43–51
31. Akingbemi BT, Ge R, Rosenfeld CS, Newton LG, Hardy DO, Catterall JF, Lubahn DB, Korach KS, Hardy MP 2003 Estrogen receptor- $\alpha$  gene deficiency enhances androgen biosynthesis in the mouse Leydig cell. *Endocrinology* 144:84–93
32. Lindzey J, Wetsel WC, Couse JF, Stoker T, Cooper R, Korach KS 1998 Effects of castration and chronic steroid treatments on hypothalamic gonadotropin-releasing hormone content and pituitary gonadotropins in male wild-type and estrogen receptor- $\alpha$  knockout mice. *Endocrinology* 139:4092–4101
33. Eddy EM, Washburn TF, Bunch DO, Goulding EH, Gladen BC, Lubahn DB, Korach KS 1996 Targeted disruption of the estrogen receptor gene in male mice causes alteration of spermatogenesis and infertility. *Endocrinology* 137:4796–4805
34. Miettinen TA 1970 Detection of changes in human cholesterol metabolism. *Ann Clin Res* 2:300–320
35. Miettinen TA, Tilvis RS, Kesäniemi YA 1990 Serum plant sterols and cholesterol precursors reflect cholesterol absorption and synthesis in volunteers of a randomly selected male population. *Am J Epidemiol* 131:20–31
36. Shan LX, Phillips DM, Bardin CW, Hardy MP 1993 Differential regulation of steroidogenic enzymes during differentiation optimizes testosterone production by adult rat Leydig cells. *Endocrinology* 133:2277–2283
37. O'Shaughnessy PJ, Willerton L, Baker PJ 2002 Changes in Leydig cell gene expression during development in the mouse. *Biol Reprod* 66:966–975
38. Ge RS, Dong Q, Sottas CM, Chen H, Zirkin BR, Hardy MP 2005 Gene expression in rat Leydig cells during development from the progenitor to adult stage: a cluster analysis. *Biol Reprod* 72:1405–1415
39. Mendis-Handagama SM, Risbridger GP, de Kretser DM 1987 Morphometric analysis of the components of the neonatal and the adult rat testis interstitium. *Int J Androl* 10:525–534
40. Abney TO 1999 The potential roles of estrogens in regulating Leydig cell development and function: a review. *Steroids* 64:610–617
41. Li X, Strauss L, Mäkelä S, Streng T, Huhtaniemi I, Santti R, Poutanen M 2004 Multiple structural and functional abnormalities in the p450 aromatase expressing transgenic male mice are ameliorated by a p450 aromatase inhibitor. *Am J Pathol* 164:1039–1048
42. Eacker SM, Shima JE, Connolly CM, Sharma M, Holdcraft RW, Griswold MD, Braun RE 2007 Transcriptional profiling of androgen receptor (AR) mutants suggests instructive and permissive roles of AR signaling in germ cell development. *Mol Endocrinol* 21:895–907
43. O'Shaughnessy PJ, Johnston H, Willerton L, Baker PJ 2002 Failure of normal adult Leydig cell development in androgen-receptor-deficient mice. *J Cell Sci* 115:3491–3496
44. Houk CP, Pearson EJ, Martinelle N, Donahoe PK, Teixeira J 2004 Feedback inhibition of steroidogenic acute regulatory protein expression *in vitro* and *in vivo* by androgens. *Endocrinology* 145:1269–1275
45. Matsui H, Takano N, Takahashi T 2005 Characterization of mouse glandular kallikrein 24 expressed in testicular Leydig cells. *Int J Biochem Cell Biol* 37:2333–2343
46. Matsui H, Takahashi T 2001 Mouse testicular Leydig cells express Klk21, a tissue kallikrein that cleaves fibronectin and IGF-binding protein-3. *Endocrinology* 142:4918–4929
47. Matsui H, Moriyama A, Takahashi T 2000 Cloning and characterization of mouse klk27, a novel tissue kallikrein expressed in testicular Leydig cells and exhibiting chymotrypsin-like specificity. *Eur J Biochem* 267:6858–6865
48. Lin T, Wang D, Nagpal ML, Shimasaki S, Ling N 1993 Expression and regulation of insulin-like growth factor-binding protein-1, -2, -3, and -4 messenger ribonucleic acids in purified rat Leydig cells and their biological effects. *Endocrinology* 132:1898–1904
49. Vernon RB, Lane TF, Angello JC, Sage H 1991 Adhesion, shape, proliferation, and gene expression of mouse Leydig cells are influenced by extracellular matrix *in vitro*. *Biol Reprod* 44:157–170
50. Beregi E, Regius O, Hüttl T, Göbl Z 1988 Age-related changes in the skeletal muscle cells. *Z Gerontol* 21:83–86
51. Coleman R, Silbermann M, Gershon D, Reznick AZ 1987 Giant mitochondria in the myocardium of aging and endurance-trained mice. *Gerontology* 33:34–39
52. Tandler B, Dunlap M, Hoppel CL, Hassan M 2002 Giant mitochondria in a cardiomyopathic heart. *Ultrastruct Pathol* 26:177–183
53. Terman A, Dalen H, Eaton JW, Neuzil J, Brunk UT 2004 Aging of cardiac myocytes in culture: oxidative stress, lipofuscin accumulation, and mitochondrial turnover. *Ann NY Acad Sci* 1019:70–77
54. Osteryoung KW, Nunnari J 2003 The division of endosymbiotic organelles. *Science* 302:1698–1704
55. Griparic L, van der Wel NN, Orozco JJ, Peters PJ, van der Blik AM 2004 Loss of the intermembrane space protein Mgm1/OPA1 induces swelling and localized constrictions along the lengths of mitochondria. *J Biol Chem* 279:18792–18798
56. Okamoto K, Shaw JM 2005 Mitochondrial morphology and dynamics in yeast and multicellular eukaryotes. *Annu Rev Genet* 39:503–536
57. Navratil M, Terman A, Arriaga EA 2008 Giant mitochondria do not fuse and exchange their contents with normal mitochondria. *Exp Cell Res* 314:164–172
58. Yang SH, Liu R, Perez EJ, Wen Y, Stevens Jr SM, Valencia T, Brun-Zinkernagel AM, Prokai L, Will Y, Dykens J, Koulen P, Simpkins JW 2004 Mitochondrial localization of estrogen receptor  $\beta$ . *Proc Natl Acad Sci USA* 101:4130–4135
59. Monje P, Boland R 2001 Subcellular distribution of native estrogen receptor  $\alpha$  and  $\beta$  isoforms in rabbit uterus and ovary. *J Cell Biochem* 82:467–479
60. Chen JQ, Eshete M, Alworth WL, Yager JD 2004 Binding of MCF-7 cell mitochondrial proteins and recombinant human estrogen receptors  $\alpha$  and  $\beta$  to human mitochondrial DNA estrogen response elements. *J Cell Biochem* 93:358–373
61. Chen JQ, Russo PA, Cooke C, Russo IH, Russo J 2007 ER $\beta$  shifts from mitochondria to nucleus during estrogen-induced neoplastic transformation of human breast epithelial cells and is involved in estrogen-induced synthesis of mitochondrial respiratory chain proteins. *Biochim Biophys Acta* 1773:1732–1746
